# Supplementary material
Source: publisher figshare collection journal article supplement (https://frontiersin.figshare.com/ndownloader/files/17433044)
Supplement: Supplementary file [file 17433044]

# SUPPLEMENTARY FIGURES AND TABLES

**Overview diagram: Figure 1** An overview summarizing the objectives of this manuscript. (1) Whole blood (WB) and platelet poor plasma (PPP) samples from Parkinson's disease individuals were used as our disease model for systemic inflammation (2), and compared to healthy whole blood and plasma samples. (3) Concentrations of various circulating inflammatory markers (multiplex and ELISA analyses) was determined, as well as blood clotting propensity (thromboelastography). Platelet ultrastructure was also shown. (4) The presence of the bacterial protease gingipain R1 was detected in PPP clots, using antibodies. Recombinant gingipain R1 was also be added to fluorescent (ALEXA488) purified fibrinogen to determine its effect on clot formation. Finally, we confirmed amyloid formation in fibrin(ogen) protein, using novel amyloid detecting fluorescent markers (Amytrackers™). We then propose how the above influences the nature of hypercoagulation (5), as well as the innate immune (dys)function in PD (6). Diagram created using BioRender (<https://biorender.com/>).

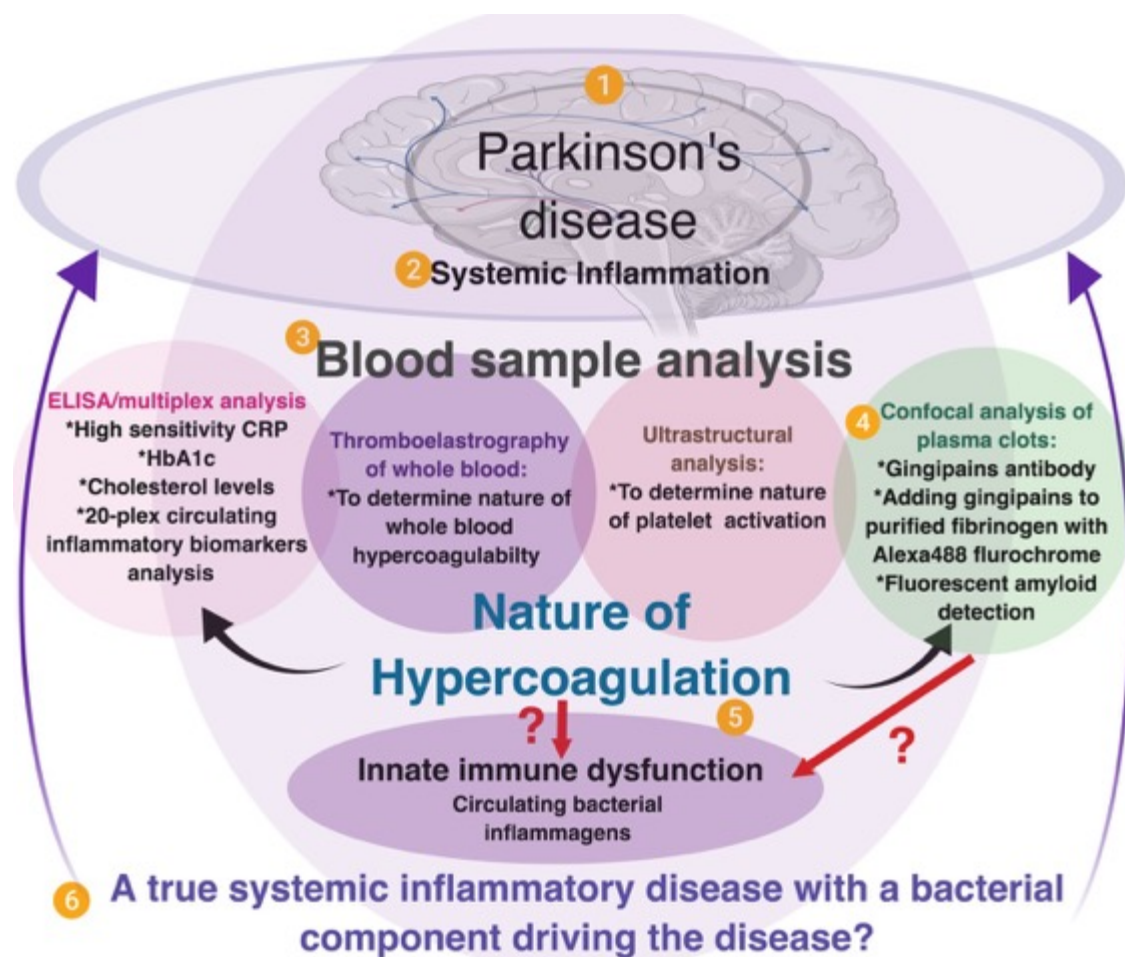

**Figure 2** PCA Exploratory Analysis: **(A)** PCA Bi-plot with colored ellipses for Control and PD populations and **(B)** corresponding Screeplot showing the distribution of variance across principle components.

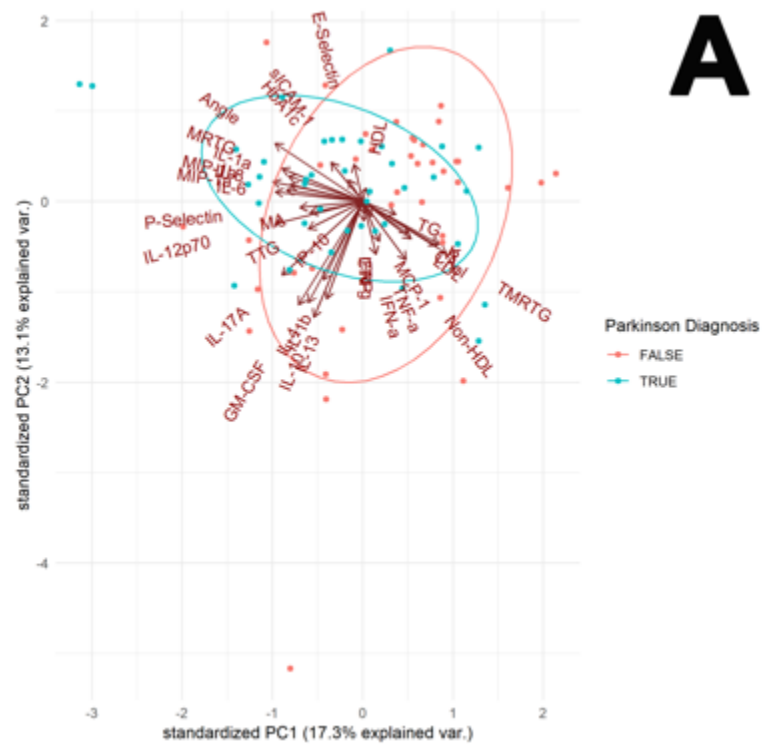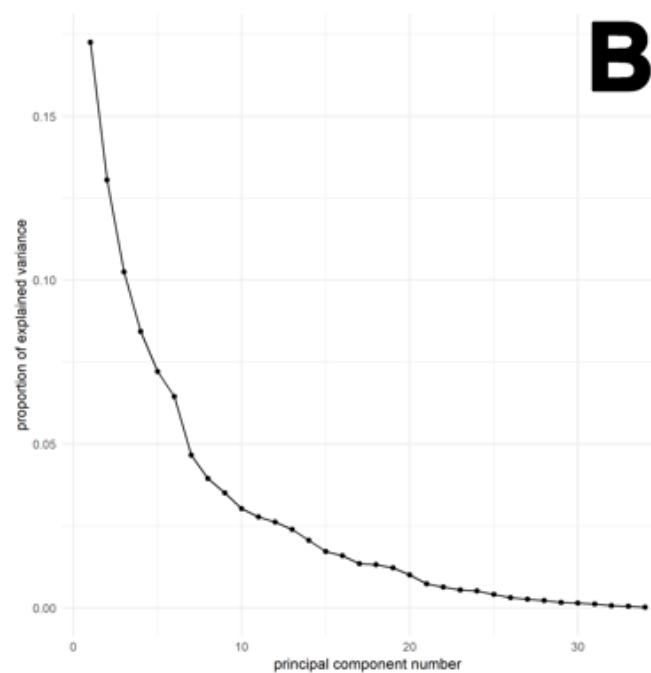

**Supplementary table 1:**

The Hoehn and Yahr staging system in Parkinson's Disease

| <b>Stage</b>     | <b>Criteria</b>                                                                       |
|------------------|---------------------------------------------------------------------------------------|
| <b>Stage 0</b>   | No signs of disease                                                                   |
| <b>Stage 1</b>   | Unilateral disease only                                                               |
| <b>Stage 1.5</b> | Unilateral disease plus axial involvement                                             |
| <b>Stage 2</b>   | Bilateral disease, without impairment of balance                                      |
| <b>Stage 2.5</b> | Mild bilateral disease, with recovery on pull test                                    |
| <b>Stage 3</b>   | Mild to moderate bilateral disease; some postural instability; physically independent |
| <b>Stage 4</b>   | Severe disability; still able to walk or stand unassisted                             |
| <b>Stage 5</b>   | Wheel chair bound or bedridden unless aided                                           |

**Supplementary table 2:**

Parkinson's disease sample demographics, Hoehn and Yahr stages, as well as medication.

| atient ID<br>PD | Age | Gender | Hoehn<br>and<br>Yahr<br>scale | PD Medication                                                          |
|-----------------|-----|--------|-------------------------------|------------------------------------------------------------------------|
| PD 1            | 58  | Male   | 2                             | Cabilev                                                                |
| PD 2            | 69  | Female | 2                             | Cabilev,Rivotril,Sinemet,Hydrochlorothiazide                           |
| PD 3            | 53  | Male   | 2                             | Cabilev,Sinemet                                                        |
| PD 4            | 68  | Male   | 3                             | Levodopa                                                               |
| PD 5            | 59  | Female | 2                             | Cabilev,Donperidone,Risperidone                                        |
| PD 6            | 66  | Male   | 3                             | Cabilev,Requip,Sinemet                                                 |
| PD 7            | 59  | Male   | 2                             | Cabilev                                                                |
| PD 8            | 59  | Male   | 3                             | Cabilev,Fluoxetine,Fludrocortisone                                     |
| PD 9            | 59  | Male   | 2                             | Cabilev                                                                |
| PD 10           | 69  | Female | 2                             | Cabilev,Amlodipine                                                     |
| PD 11           | 68  | Female | 3                             | Cabilev,Aspirin,Metformin                                              |
| PD 12           | 75  | Male   | 2.5                           | Cabilev                                                                |
| PD 13           | 64  | Male   | 2.5                           | Cabilev,Ropinirole                                                     |
| PD 14           | 65  | Male   | 1                             | Cabilev,Pexola                                                         |
| PD 15           | 64  | Female | 1                             | Cabilev,Clonazepam,Metformin,Enalapril                                 |
| PD 16           | 66  | Female | 4                             | Cabilev,Ropinirole,Amlodipine,Clonazepam,Oxazepam                      |
| PD 17           | 64  | Male   | 1                             | Cabilev,Enalapril                                                      |
| PD 18           | 63  | Male   | 2.5                           | Cabilev,Rivotril                                                       |
| PD 19           | 64  | Male   | 4                             | Cabilev,Rivotril,Pexola,Orphenadrine                                   |
| PD20            | 72  | Female | 3                             | Cabilev,Donperidone                                                    |
| PD 21           | 87  | Male   | 2                             | Cabilev,Levodopa,Metformin,Aspirin,Atenolol                            |
| PD 22           | 70  | Male   | 2                             | Cabilev,Clonazepam,Sinemet,Enalapril                                   |
| PD 23           | 62  | Female | 3                             | Cabilev,Pexola                                                         |
| PD 24           | 71  | Female | 4                             | Cabilev,Sinemet,Aspirin                                                |
| PD 25           | 64  | Male   | 1.5                           | Cabilev                                                                |
| PD 26           | 63  | Male   | 3                             | Cabilev,Clonazepam,Pexola,Rivotril, Amlodipine,<br>Hydrochlorothiazide |
| PD 27           | 77  | Female | 2                             | Cabilev,Clonazepam                                                     |
| PD 28           | 71  | Female | 1                             | Cabilev,Sinemet,Amlodipine,Aspirin, Metformin                          |
| PD 29           | 73  | Male   | 2                             | Newly diagnosed, Metformin                                             |
| PD 30           | 87  | Male   | 3                             | Cabilev,Aspirin,Simvastatin,Metformin                                  |
| PD 31           | 72  | Female | 5                             | Cabilev,Insulin                                                        |
| PD 32           | 65  | Male   | 2                             | Cabilev,Amlodipine                                                     |
| PD 33           | 81  | Male   | 2.5                           | Cabilev                                                                |
| PD 34           | 52  | Male   | 1                             | Cabilev,Insulin                                                        |
| PD 35           | 60  | female | 2.5                           | Cabilev,Rivotril,Orphenadrine                                          |
| PD 36           | 72  | Male   | 1                             | Cabilev,Pexola,Enalapril                                               |

|       |    |        |     |                         |
|-------|----|--------|-----|-------------------------|
| PD 37 | 79 | Male   | 2.5 | Cabilev                 |
| PD 38 | 83 | Female | 2   | Cabilev,Rivotril        |
| PD 39 | 59 | Female | 1   | Orphenadrine,Clonazepam |
| PD 40 | 84 | Male   | 3   | Cabilev                 |
